# Supplementary material for: Mycobacterium tuberculosis Malate Synthase Structures with Fragments Reveal a Portal for Substrate/Product Exchange
Source: PubMed Central journal article supplement (PMC5207166; doi:10.1074/jbc.m116.750877), 2016-10-13

Supplemental Data

for

*Mycobacterium tuberculosis* malate synthase structures with fragments reveal a portal for  
substrate/product exchange

**Hsiao-Ling Huang<sup>1\*</sup>, Inna V. Krieger<sup>2\*</sup>, Maloy K. Parai<sup>2</sup>, Vijay B. Gawandi<sup>2</sup>, James C. Sacchettini<sup>1,2</sup>**

<sup>1</sup>Department of Chemistry

<sup>2</sup>Department of Biochemistry and Biophysics

Texas A&M University, College Station, Texas 77845, USA

Table S1. Chemical structure and  $\Delta T_m$  for hit (no crystal structure) from the fragment screen.

| Chemical Structure                                                                  | $\Delta T_m$ ( $^{\circ}\text{C}$ ) | Chemical Structure                                                                   | $\Delta T_m$ ( $^{\circ}\text{C}$ ) |
|-------------------------------------------------------------------------------------|-------------------------------------|--------------------------------------------------------------------------------------|-------------------------------------|
| 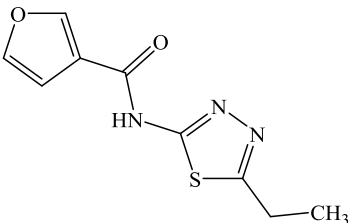   | 3.3                                 |    | 3.3                                 |
|    | 3.6                                 |    | 3.1                                 |
|    | 4.6                                 |    | 3.4                                 |
|   | 3.3                                 |    | 3.2                                 |
|  | 3.2                                 |  | 3.9                                 |
|  | 3.7                                 |  | 4.5                                 |

Table S1. Continued.

| Chemical Structure                                                                  | $\Delta T_m$ (°C) | Chemical Structure                                                                   | $\Delta T_m$ (°C) |
|-------------------------------------------------------------------------------------|-------------------|--------------------------------------------------------------------------------------|-------------------|
| 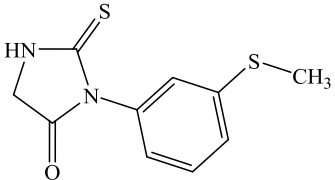   | 3.2               |    | 6.9               |
|    | 4.9               |    | 3.1               |
|   | 3.1               |    | 3.4               |
|  | 3.2               |   | 4.3               |
|  | 3.3               |  | 3.4               |
|                                                                                     |                   |  | 3.3               |
|                                                                                     |                   |  | 4.3               |

Table S1. Continued.

| Chemical Structure                                                                  | $\Delta T_m$ (°C) | Chemical Structure                                                                  | $\Delta T_m$ (°C) |
|-------------------------------------------------------------------------------------|-------------------|-------------------------------------------------------------------------------------|-------------------|
| 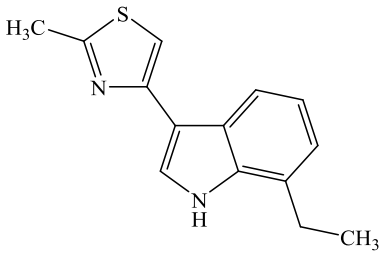   | 3.6               |   | 5.8               |
|    | 3.5               |   | 3.5               |
|   | 3.5               |   | 3.4               |
|  | 5.7               |  | 6.5               |
|  | 5.7               |  | 6.5               |
|  | 5.7               |  | 6.5               |
|  | 5.7               |  | 6.5               |
|  | 5.7               |  | 6.5               |
|  | 5.7               |  | 6.5               |
|  | 5.7               |  | 6.5               |
|  | 5.7               |  | 6.5               |
|  | 5.7               |  | 6.5               |
|  | 5.7               |  | 6.5               |
|  | 5.7               |  | 6.5               |
|  | 5.7               |  | 6.5               |
|  | 5.7               |  | 6.5               |
|  | 5.7               |  | 6.5               |
|  | 5.7               |  | 6.5               |
|  | 5.7               |  | 6.5               |
|  | 5.7               |  | 6.5               |
|  | 5.7               |  | 6.5               |
|  | 5.7               |  | 6.5               |
|  | 5.7               |  | 6.5               |
|  | 5.7               |  | 6.5               |
|  | 5.7               |  | 6.5               |
|  | 5.7               |  | 6.5               |
|  | 5.7               |  | 6.5               |
|  | 5.7               |  | 6.5               |
|  | 5.7               |  | 6.5               |
|  | 5.7               |  | 6.5               |
|  | 5.7               |  | 6.5               |
|  | 5.7               |  | 6.5               |
|  | 5.7               |  | 6.5               |
|  | 5.7               |  | 6.5               |
|  | 5.7               |  | 6.5               |
|  | 5.7               |  | 6.5               |
|  | 5.7               |  | 6.5               |
|  | 5.7               |  | 6.5               |
|  | 5.7               |  | 6.5               |
|  | 5.7               |  | 6.5               |
|  | 5.7               |  | 6.5               |
|  | 5.7               |  | 6.5               |
|  | 5.7               |  | 6.5               |
|  | 5.7               |  | 6.5               |
|  | 5.7               |  | 6.5               |
|  | 5.7               |  | 6.5               |
|  | 5.7               |  | 6.5               |
|  | 5.7               |  | 6.5               |
|  | 5.7               |  | 6.5               |
|  | 5.7               |  | 6.5               |
|  | 5.7               |  | 6.5               |
|  | 5.7               |  | 6.5               |
|  | 5.7               |  | 6.5               |
|  | 5.7               |  | 6.5               |
|  | 5.7               |  | 6.5               |
|  | 5.7               |  | 6.5               |
|  | 5.7               |  | 6.5               |
|  | 5.7               |  | 6.5               |
|  | 5.7               |  | 6.5               |
|  | 5.7               |  | 6.5               |
|  | 5.7               |  | 6.5               |
|  | 5.7               |  | 6.5               |
|  | 5.7               |  | 6.5               |
|  | 5.7               |  | 6.5               |
|  | 5.7               |  | 6.5               |
|  | 5.7               |  | 6.5               |
|  | 5.7               |  | 6.5               |
|  | 5.7               |  | 6.5               |
|  | 5.7               |  | 6.5               |
|  | 5.7               |  | 6.5               |
|  | 5.7               |  | 6.5               |
|  | 5.7               |  | 6.5               |
|  | 5.7               |  | 6.5               |
|  | 5.7               |  | 6.5               |
|  | 5.7               |  | 6.5               |
|  | 5.7               |  | 6.5               |
|  | 5.7               |  | 6.5               |
|  | 5.7               |  | 6.5               |
|  | 5.7               |  | 6.5               |
|                                                                                     |                   |                                                                                     |                   |

Table S1. Continued.

| Chemical Structure                                                                  | $\Delta T_m$ (°C) | Chemical Structure                                                                   | $\Delta T_m$ (°C) |
|-------------------------------------------------------------------------------------|-------------------|--------------------------------------------------------------------------------------|-------------------|
| 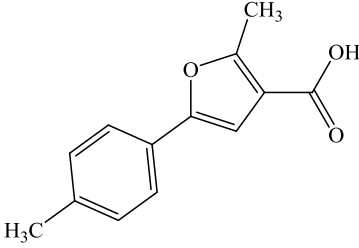   | 6.9               |    | 3.2               |
|    | 5.4               |    | 7.1               |
|    | 5.7               |   | 3.4               |
|  | 4.1               |  | 3.4               |
|  | 3.1               |  | 3.1               |
|  | 3.4               |                                                                                      |                   |

## Compound synthesis

Table S2. Indole diketo acid synthesis and starting material.

| No | Chemical structure                                                                  | No  | Starting chemical structure                                                          |
|----|-------------------------------------------------------------------------------------|-----|--------------------------------------------------------------------------------------|
| 19 | 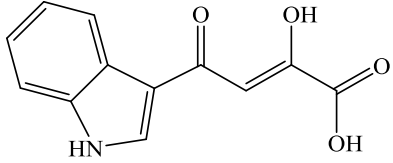   | 19a |    |
| 20 |    |     |                                                                                      |
| 21 |    | 21a |    |
| 22 |  | 22a |  |
| 23 |  | 23a |  |

Table S2. Continued.

| No | Chemical structure | No  | Starting chemical structure |
|----|--------------------|-----|-----------------------------|
| 24 |                    | 24a |                             |
| 25 |                    | 25a |                             |
| 26 |                    | 26a |                             |
| 27 |                    | 27a |                             |

Scheme S1. General synthesis steps for indole diketo acids, **19-27**.

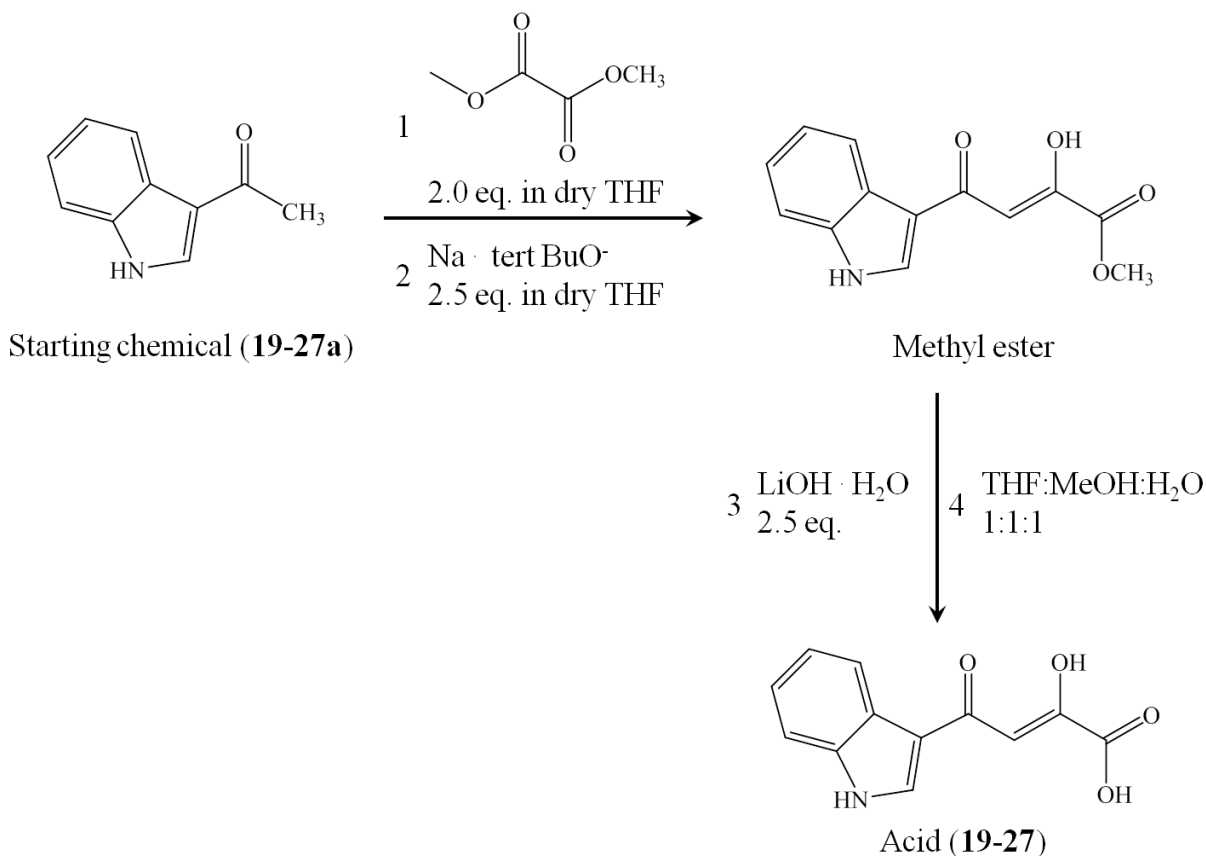

Compounds **19-27** were synthesized via the synthetic procedure shown in **Scheme 1** and described as follows: To a slurry of <sup>t</sup>BuONa (1.00 g, 5.36 mmol) in dry THF under N<sub>2</sub> (8 mL) a solution of starting material aldehyde (**19a-27a**, **Table S1**) in 2.0 mL anhydrous THF was added and via syringe. The mixture was stirred at room temperature for 30 min. and then dimethyl oxalate (2.2 equiv, 11.8 mmol, 1.39 g) was added. After 48 hours, the reaction mixture was quenched with 2.0 mL of 2 M HCl (aq) and extracted with EtOAc. The combined organic layer was washed with 10 mL brine solution, dried over anhydrous Na<sub>2</sub>SO<sub>4</sub>, filtered, and concentrated in vacuo. The crude mixture was purified by a silica gel column chromatography to afford the desired methyl-ester as an amorphous solid.

Methyl-ester of **19-27** was dissolved in 4 mL of 2:1:1 mixture of (THF/CH<sub>3</sub>OH/H<sub>2</sub>O) and xx mg (0.212 mmol) of LiOH monohydrate was added. The yellow solution was stirred for 6 h, and after



completion of hydrolysis the reaction mixture was acidified to pH 4 with 2 M HCl (aq), and the resulting mixture was extracted with 2x5 mL EtOAc. The combined organic phase was dried (Na<sub>2</sub>SO<sub>4</sub>), filtered, and concentrated to afford the desired acid product (**19-27**) as a solid.

Chemical information:

Compound **19**, (Z)-2-hydroxy-4-(1H-indol-3-yl)-4-oxobut-2-enoic acid: <sup>1</sup>H NMR (400 MHz, DMSO-*d*<sub>6</sub>) δ 8.29 (s, 1H), 8.18 (d, *J* = 7.2 Hz, 1H), 7.47 (d, *J* = 7.5 Hz, 1H), 7.23-7.16 (m, 2H), 2.50 (s, 3H); <sup>13</sup>C NMR (100 MHz, CDCl<sub>3</sub>) δ 137.11, 134.74 (2C), 125.75, 123.14 (2C), 122.06 (2C), 121.76 (2C), 117.26, 112.50 (2C); MS (ESI) *m/z* 511.37 (M + Na)<sup>+</sup>.

Compound **20**, (Z)-4-(1H-indol-3-yl)-2-methoxy-4-oxobut-2-enoic acid: <sup>1</sup>H NMR (400 MHz, DMSO-*d*<sub>6</sub>) δ 8.71 (s, 1H), 8.24 (d, *J* = 7.3 Hz, 1H), 7.60-7.56 (m, 1H), 7.36-7.24 (m, 3H), 6.94 (s, 1H), 3.89 (s, 3H); <sup>13</sup>C NMR (100 MHz, CDCl<sub>3</sub>) δ 164.25, 163.70, 139.47, 138.25, 126.06, 123.94, 123.25, 122.09, 114.10, 111.59, 100.64, 33.90; MS (ESI) *m/z* 511.37 (M + Na)<sup>+</sup>.

Compound **21**, (Z)-2-hydroxy-4-(2-methyl-1H-indol-3-yl)-4-oxobut-2-enoic acid: <sup>1</sup>H NMR (400 MHz, DMSO-*d*<sub>6</sub>) δ 8.05-7.95 (m, 1H), 7.49-7.38 (m, 1H), 7.28-7.17 (m, 2H), 6.86 (s, 1H), 2.74 (s, 3H); <sup>13</sup>C NMR (100 MHz, CDCl<sub>3</sub>) δ 188.27, 167.92, 164.31, 146.84, 135.76, 126.74, 123.07, 122.60, 120.81, 112.28, 110.70, 100.35, 15.73; MS (ESI) *m/z* 511.37 (M + Na)<sup>+</sup>.

Compound **22**, (Z)-2-hydroxy-4-(3-methyl-1H-indol-2-yl)-4-oxobut-2-enoic acid: <sup>1</sup>H NMR (400 MHz, DMSO-*d*<sub>6</sub>) δ 8.05-7.95 (m, 1H), 7.49-7.38 (m, 1H), 7.28-7.17 (m, 2H), 6.86 (s, 1H), 2.74 (s, 3H); <sup>13</sup>C NMR (100 MHz, CDCl<sub>3</sub>) δ 188.27, 167.92, 164.31, 146.84, 135.76, 126.74, 123.07, 122.60, 120.81, 112.28, 110.70, 100.35, 15.73; MS (ESI) *m/z* 511.37 (M + Na)<sup>+</sup>.

Compound **23**, (Z)-2-hydroxy-4-(1H-indol-5-yl)-4-oxobut-2-enoic acid: <sup>1</sup>H NMR (400 MHz, DMSO-*d*<sub>6</sub>) δ 8.44 (s, 1H), 7.83 (dd, *J* = 8.6, 1.2 Hz, 1H), 7.56-7.45 (m, 2H), 7.17 (s, 1H), 6.65-6.59 (m, 1H); <sup>13</sup>C NMR (100 MHz, CDCl<sub>3</sub>) δ 163.94, 139.69, 128.13, 126.46, 122.88, 121.27, 112.45, 103.77, 98.27; MS (ESI) *m/z* 511.37 (M + Na)<sup>+</sup>.

Compound **24**, (Z)-4-(1,4-dimethyl-1H-indol-5-yl)-2-hydroxy-4-oxobut-2-enoic acid: <sup>1</sup>H NMR (400 MHz, DMSO-*d*<sub>6</sub>) δ 7.59 (d, *J* = 8.7 Hz, 1H), 7.47-7.35 (m, 2H), 6.87 (s, 1H), 6.69 (d, *J* = 2.9 Hz,

1H), 3.82 (s, 3H), 2.73 (s, 3H); <sup>13</sup>C NMR (100 MHz, CDCl<sub>3</sub>) δ 183.43, 163.93, 138.22, 132.86, 131.44, 129.81, 126.36, 123.30, 108.22, 102.18, 101.67, 33.17, 17.62; MS (ESI) *m/z* 511.37 (M + Na)<sup>+</sup>.

Compound **25**, (*Z*)-2-hydroxy-4-(3-methyl-1H-indol-5-yl)-4-oxobut-2-enoic acid: <sup>1</sup>H NMR (400 MHz, DMSO-*d*<sub>6</sub>) δ 8.33 (d, *J* = 8.2 Hz, 1H), 7.83 (d, *J* = 8.2 Hz, 1H) , 7.62-7.57 (m, 1H), 7.43-7.39 (m, 1H), 6.03 (s, 1H), 2.61 (s, 3H); <sup>13</sup>C NMR (100 MHz, CDCl<sub>3</sub>) δ 183.43, 163.93, 138.22, 132.86, 131.44, 129.81, 126.36, 123.30, 108.22, 102.18, 101.67, 33.17, 17.62; MS (ESI) *m/z* 511.37 (M + Na)<sup>+</sup>.

Compound **26**, (*Z*)-2-hydroxy-4-(6-methyl-1H-indol-5-yl)-4-oxobut-2-enoic acid: <sup>1</sup>H NMR (400 MHz, DMSO-*d*<sub>6</sub>) δ 11.34 (s, 1H), 8.14 (s, 1H), 7.45-7.38 (m, 1H) , 7.36-7.29 (m, 1H) , 6.95 (s, 1H), 6.56 (s, 1H), 2.61 (s, 3H); <sup>13</sup>C NMR (100 MHz, CDCl<sub>3</sub>) δ 163.96, 138.79, 131.59, 127.74, 127.29, 126.08, 124.15, 114.58, 103.10, 101.77, 22.45; MS (ESI) *m/z* 511.37 (M + Na)<sup>+</sup>.

Compound **27**, (*Z*)-2-hydroxy-4-(4-methyl-1H-indol-5-yl)-4-oxobut-2-enoic acid: <sup>1</sup>H NMR (400 MHz, DMSO-*d*<sub>6</sub>) δ 7.55 (d, *J* = 8.5 Hz, 1H), 7.50-7.44 (m, 1H) , 7.37 (d, *J* = 8.5 Hz, 1H), 6.89 (s, 1H), 6.75-6.67 (m, 1H), 2.75 (s, 3H); <sup>13</sup>C NMR (100 MHz, CDCl<sub>3</sub>) δ 183.43, 163.93, 138.22, 132.86, 131.44, 129.81, 126.36, 123.30, 108.22, 102.18, 101.67, 33.17, 17.62; MS (ESI) *m/z* 511.37 (M + Na)<sup>+</sup>.

Table S3. Crystal data collection and refinement statistics.

| Statistics                                           | GlcB C619A-1<br>complex          | GlcB C619A-2<br>complex          | GlcB C619A-3<br>complex          | GlcB C619A-4<br>complex          |
|------------------------------------------------------|----------------------------------|----------------------------------|----------------------------------|----------------------------------|
| PDB ID                                               | 5C9R                             | 5T8G                             | 5C9U                             | 5C9W                             |
| Data Collection                                      |                                  |                                  |                                  |                                  |
| Wavelegnth (Å)                                       | 0.97918                          | 0.97915                          | 0.97947                          | 0.97946                          |
| Space group                                          | P4 <sub>3</sub> 2 <sub>1</sub> 2 | P4 <sub>3</sub> 2 <sub>1</sub> 2 | P4 <sub>3</sub> 2 <sub>1</sub> 2 | P4 <sub>3</sub> 2 <sub>1</sub> 2 |
| Cell dimensions                                      |                                  |                                  |                                  |                                  |
| <i>a</i> , <i>b</i> , <i>c</i> (Å)                   | 78.50, 78.50,<br>224.28          | 78.85, 78.85,<br>224.93          | 78.74, 78.74,<br>224.66          | 78.21, 78.21,<br>223.82          |
| $\alpha$ , $\beta$ , $\gamma$ (°)                    | 90, 90, 90                       | 90, 90, 90                       | 90, 90, 90                       | 90, 90, 90                       |
| Unique reflections                                   | 47444                            | 46135                            | 49254                            | 40353                            |
| <i>R</i> <sub>sym</sub> or <i>R</i> <sub>merge</sub> | 0.189 (0.799)                    | 0.160 (0.574)                    | 0.114 (0.530)                    | 0.203 (0.724)                    |
| <i>I</i> / $\sigma$ <i>I</i>                         | 7.63 (1.01)                      | 23.3 (4.07)                      | 24.21(6.95)                      | 18.82 (3.66)                     |
| Completeness (%)                                     | 98.5 (96.9)                      | 99.4 (98.4)                      | 93.48 (97.19)                    | 96.03 (98.92)                    |
| Redudancy                                            | 6.5 (4.1)                        | 13.5 (11.4)                      | 4.5 (4.3)                        | 9.4 (8.3)                        |
| Refinement                                           |                                  |                                  |                                  |                                  |
| Resolution (Å)                                       | 44.57-2.00<br>(2.04-2.00)        | 45.78-2.04<br>(2.08-2.04)        | 44.68-1.95<br>(1.99-1.95)        | 44.43-2.09<br>(2.14-2.09)        |
| <i>R</i> <sub>work</sub> / <i>R</i> <sub>free</sub>  | 0.187/0.250                      | 0.162/0.208                      | 0.183/0.236                      | 0.176/0.235                      |
| No. of atoms                                         |                                  |                                  |                                  |                                  |
| Protein                                              | 5480                             | 5475                             | 5466                             | 5457                             |
| Ligand/ion                                           | 14                               | 18                               | 17                               | 16                               |
| Water                                                | 639                              | 580                              | 620                              | 593                              |
| B factors                                            |                                  |                                  |                                  |                                  |
| Protein                                              | 31.3                             | 29.1                             | 35.5                             | 29.3                             |
| Mg                                                   | 19.4                             | 28.6                             | 34.9                             | 25.7                             |
| Small molecule                                       | 31.1                             | 25.7                             | 39.2                             | 34.2                             |
| Solvent                                              | 36.7                             | 39.2                             | 42.9                             | 35.2                             |
| Rmsd                                                 |                                  |                                  |                                  |                                  |
| Bond length (Å)                                      | 0.008                            | 0.008                            | 0.009                            | 0.009                            |
| Bond angles (°)                                      | 1.15                             | 1.11                             | 1.19                             | 1.06                             |
| Ramachandran                                         |                                  |                                  |                                  |                                  |
| Favored (%)                                          | 96.9                             | 97.3                             | 96.5                             | 97.4                             |
| Allowed                                              | 2.4                              | 2.4                              | 2.6                              | 2.3                              |
| Outliers (%)                                         | 0.7                              | 0.3                              | 1.0                              | 0.3                              |
| Clashscore                                           | 3.94                             | 2.93                             | 2.11                             | 2.67                             |

Statistics for the highest-resolution shell are shown in parentheses.

Table S3. Continued.

| Statistics                                           | GlcB C619A-5<br>complex          | GlcB C619A-6<br>complex          | GlcB C619A-7<br>complex          | GlcB C619A-8<br>complex          |
|------------------------------------------------------|----------------------------------|----------------------------------|----------------------------------|----------------------------------|
| PDB ID                                               | 5C9X                             | 5CAH                             | 5E9X                             | 5C7V                             |
| Data Collection                                      |                                  |                                  |                                  |                                  |
| Wavelength (Å)                                       | 0.97946                          | 1.0000                           | 1.0076                           | 0.91943                          |
| Space group                                          | P4 <sub>3</sub> 2 <sub>1</sub> 2 | P4 <sub>3</sub> 2 <sub>1</sub> 2 | P4 <sub>3</sub> 2 <sub>1</sub> 2 | P4 <sub>3</sub> 2 <sub>1</sub> 2 |
| Cell dimensions                                      |                                  |                                  |                                  |                                  |
| <i>a</i> , <i>b</i> , <i>c</i> (Å)                   | 79.36, 79.36,<br>225.31          | 80.69, 80.69,<br>226.29          | 81.66, 81.66,<br>226.56          | 78.88, 78.88,<br>224.66          |
| $\alpha$ , $\beta$ , $\gamma$ (°)                    | 90, 90, 90                       | 90, 90, 90                       | 90, 90, 90                       | 90, 90, 90                       |
| Unique reflections                                   | 40993                            | 33871                            | 56725                            | 25218                            |
| <i>R</i> <sub>sym</sub> or <i>R</i> <sub>merge</sub> | 0.120 (0.597)                    | 0.103 (0.598)                    | 0.367 (0.651)                    | 0.205 (0.738)                    |
| <i>I</i> / $\sigma$ <i>I</i>                         | 26.24 (4.42)                     | 15.49 (2.89)                     | 14.61 (2.28)                     | 18.15 (5.60)                     |
| Completeness (%)                                     | 95.33 (94.74)                    | 99.45 (99.16)                    | 98.63 (92.87)                    | 99.37 (98.87)                    |
| Redundancy                                           | 9.4 (8.3)                        | 6.6 (6.6)                        | 8.6 (4.9)                        | 13.5 (13.6)                      |
| Refinement                                           |                                  |                                  |                                  |                                  |
| Resolution (Å)                                       | 35.14-2.10<br>(2.15-2.10)        | 39.47-2.30<br>(2.34-2.30)        | 35.87-1.94<br>(2.01-1.94)        | 49.96-2.50<br>(2.60-2.50)        |
| <i>R</i> <sub>work</sub> / <i>R</i> <sub>free</sub>  | 0.173/0.237                      | 0.202/0.290                      | 0.219/0.284                      | 0.157/0.244                      |
| No. of atoms                                         |                                  |                                  |                                  |                                  |
| Protein                                              | 5489                             | 5404                             | 5488                             | 5475                             |
| Ligand/ion                                           | 15                               | 16                               | 15                               | 11                               |
| Water                                                | 597                              | 498                              | 483                              | 475                              |
| B factors                                            |                                  |                                  |                                  |                                  |
| Protein                                              | 40.2                             | 41.5                             | 51.3                             | 34.6                             |
| Mg                                                   | 33.8                             | 38.1                             | 54.3                             | 32.2                             |
| Small molecule                                       | 37.5                             | 36.6                             | 46.3                             | 30.9                             |
| Solvent                                              | 46.0                             | 43.9                             | 54.6                             | 37.0                             |
| Rmsd                                                 |                                  |                                  |                                  |                                  |
| Bond length (Å)                                      | 0.007                            | 0.008                            | 0.007                            | 0.007                            |
| Bond angles (°)                                      | 1.13                             | 1.08                             | 1.06                             | 1.19                             |
| Ramachandran                                         |                                  |                                  |                                  |                                  |
| Favored (%)                                          | 95.9                             | 95.4                             | 96.0                             | 95.1                             |
| Allowed                                              | 3.5                              | 4.3                              | 3.1                              | 3.5                              |
| Outliers (%)                                         | 0.6                              | 0.3                              | 0.9                              | 1.4                              |
| Clashscore                                           | 3.38                             | 3.10                             | 3.84                             | 4.68                             |

Statistics for the highest-resolution shell are shown in parentheses.

Table S3. Continued.

| Statistics                                           | GlcB C619A-9<br>complex          | GlcB C619A-10<br>complex         | GlcB C619A-11<br>complex         | GlcB C619A-12<br>complex         |
|------------------------------------------------------|----------------------------------|----------------------------------|----------------------------------|----------------------------------|
| PDB ID                                               | 5CAK                             | 5CJN                             | 5CC3                             | 5CBB                             |
| Data Collection                                      |                                  |                                  |                                  |                                  |
| Wavelength (Å)                                       | 1.0000                           | 0.97949                          | 1.0332                           | 0.97944                          |
| Space group                                          | P4 <sub>3</sub> 2 <sub>1</sub> 2 | P4 <sub>3</sub> 2 <sub>1</sub> 2 | P4 <sub>3</sub> 2 <sub>1</sub> 2 | P4 <sub>3</sub> 2 <sub>1</sub> 2 |
| Cell dimensions                                      |                                  |                                  |                                  |                                  |
| <i>a</i> , <i>b</i> , <i>c</i> (Å)                   | 78.24, 78.24,<br>223.57          | 78.81, 78.81,<br>223.82          | 78.24, 78.24,<br>224.15          | 80.82, 80.82,<br>225.99          |
| $\alpha$ , $\beta$ , $\gamma$ (°)                    | 90, 90, 90                       | 90, 90, 90                       | 90, 90, 90                       | 90, 90, 90                       |
| Unique reflections                                   | 47969                            | 36629                            | 31589                            | 50605                            |
| <i>R</i> <sub>sym</sub> or <i>R</i> <sub>merge</sub> | 0.146 (0.539)                    | 0.111 (0.423)                    | 0.153 (0.183)                    | 0.164 (0.724)                    |
| <i>I</i> / $\sigma$ <i>I</i>                         | 23.12 (2.83)                     | 25.49 (1.70)                     | 27.54 (3.30)                     | 23.45 (3.03)                     |
| Completeness (%)                                     | 99.04 (94.39)                    | 97.62 (94.86)                    | 87.26 (67.06)                    | 99.81 (98.89)                    |
| Redundancy                                           | 6.6 (6.6)                        | 8.1 (7.1)                        | 6.3 (2.7)                        | 13.1 (9.4)                       |
| Refinement                                           |                                  |                                  |                                  |                                  |
| Resolution (Å)                                       | 49.58-1.99<br>(2.00-1.99)        | 44.65-2.19<br>(2.24-2.19)        | 44.46-2.20<br>(2.27-2.20)        | 45.53-2.01<br>(2.05-2.01)        |
| <i>R</i> <sub>work</sub> / <i>R</i> <sub>free</sub>  | 0.164/0.221                      | 0.171/0.228                      | 0.177/0.249                      | 0.214/0.275                      |
| No. of atoms                                         |                                  |                                  |                                  |                                  |
| Protein                                              | 5494                             | 5447                             | 5473                             | 5454                             |
| Ligand/ion                                           | 16                               | 24                               | 15                               | 18                               |
| Water                                                | 695                              | 548                              | 580                              | 522                              |
| B factors                                            |                                  |                                  |                                  |                                  |
| Protein                                              | 17.7                             | 25.2                             | 30.5                             | 30.4                             |
| Mg                                                   | 11.9                             | 33.7                             | 20.5                             | 24.0                             |
| Small molecule                                       | 22.4                             | 23.5                             | 33.4                             | 26.8                             |
| Solvent                                              | 26.1                             | 32.4                             | 36.2                             | 33.2                             |
| Rmsd                                                 |                                  |                                  |                                  |                                  |
| Bond length (Å)                                      | 0.007                            | 0.008                            | 0.008                            | 0.007                            |
| Bond angles (°)                                      | 1.08                             | 1.10                             | 1.16                             | 1.03                             |
| Ramachandran                                         |                                  |                                  |                                  |                                  |
| Favored (%)                                          | 96.8                             | 96.6                             | 96.2                             | 95.8                             |
| Allowed                                              | 2.8                              | 2.7                              | 2.8                              | 3.4                              |
| Outliers (%)                                         | 0.4                              | 0.7                              | 1.0                              | 0.9                              |
| Clashscore                                           | 3.10                             | 3.68                             | 5.13                             | 3.96                             |

Statistics for the highest-resolution shell are shown in parentheses.

Table S3 Continued.

| Statistics                                           | GlcB C619A-13<br>complex         | GlcB C619A-14<br>complex         | GlcB C619A-15<br>complex         | GlcB C619A-16<br>complex         |
|------------------------------------------------------|----------------------------------|----------------------------------|----------------------------------|----------------------------------|
| PDB ID                                               | 5CJM                             | 5CBI                             | 5CBI                             | 5CCZ                             |
| Data Collection                                      |                                  |                                  |                                  |                                  |
| Wavelength (Å)                                       | 0.97960                          | 0.97924                          | 0.97947                          | 0.97944                          |
| Space group                                          | P4 <sub>3</sub> 2 <sub>1</sub> 2 | P4 <sub>3</sub> 2 <sub>1</sub> 2 | P4 <sub>3</sub> 2 <sub>1</sub> 2 | P4 <sub>3</sub> 2 <sub>1</sub> 2 |
| Cell dimensions                                      |                                  |                                  |                                  |                                  |
| <i>a</i> , <i>b</i> , <i>c</i> (Å)                   | 80.76, 80.76,<br>226.6           | 79.8, 79.8,<br>225.06            | 79.03, 79.03,<br>225.86          | 81.51, 81.51,<br>227.03          |
| $\alpha$ , $\beta$ , $\gamma$ (°)                    | 90, 90, 90                       | 90, 90, 90                       | 90, 90, 90                       | 90, 90, 90                       |
| Unique reflections                                   | 42208                            | 50244                            | 46965                            | 42379                            |
| <i>R</i> <sub>sym</sub> or <i>R</i> <sub>merge</sub> | 0.140 (0.440)                    | 0.165 (0.756)                    | 0.236 (0.791)                    | 0.151 (0.732)                    |
| <i>I</i> / $\sigma$ <i>I</i>                         | 13.38 (1.18)                     | 25.86 (1.49)                     | 15.81 (2.31)                     | 30.62 (3.46)                     |
| Completeness (%)                                     | 98.19 (86.95)                    | 98.38 (88.26)                    | 89.10 (90.15)                    | 97.48 (93.87)                    |
| Redundancy                                           | 16.5 (14.6)                      | 8.7 (4.7)                        | 5.4 (3.3)                        | 15.9 (11.6)                      |
| Refinement                                           |                                  |                                  |                                  |                                  |
| Resolution (Å)                                       | 40.22-2.13<br>(2.18-2.13)        | 45.11-1.99<br>(2.03-1.99)        | 44.87-1.96<br>(2.00-1.96)        | 35.88-2.14<br>(2.19-2.14)        |
| <i>R</i> <sub>work</sub> / <i>R</i> <sub>free</sub>  | 0.208/0.299                      | 0.193/0.241                      | 0.208/0.272                      | 0.193/0.250                      |
| No. of atoms                                         |                                  |                                  |                                  |                                  |
| Protein                                              | 5446                             | 5503                             | 5421                             | 5451                             |
| Ligand/ion                                           | 13                               | 41                               | 13                               | 15                               |
| Water                                                | 376                              | 451                              | 535                              | 489                              |
| B factors                                            |                                  |                                  |                                  |                                  |
| Protein                                              | 29.2                             | 36.3                             | 35.9                             | 30.9                             |
| Mg                                                   | 20.5                             | 23.5                             | 26.6                             | 24.9                             |
| Small molecule                                       | 29.1                             | 38.9                             | 46.4                             | 30.2                             |
| Solvent                                              | 28.2                             | 40.9                             | 42.4                             | 34.6                             |
| Rmsd                                                 |                                  |                                  |                                  |                                  |
| Bond length (Å)                                      | 0.008                            | 0.009                            | 0.007                            | 0.008                            |
| Bond angles (°)                                      | 1.13                             | 1.75                             | 1.12                             | 1.13                             |
| Ramachandran                                         |                                  |                                  |                                  |                                  |
| Favored (%)                                          | 96.2                             | 96.5                             | 97.2                             | 96.2                             |
| Allowed                                              | 3.3                              | 2.8                              | 2.0                              | 3.3                              |
| Outliers (%)                                         | 0.6                              | 0.7                              | 0.9                              | 0.6                              |
| Clashscore                                           | 6.82                             | 3.55                             | 4.36                             | 3.87                             |

Statistics for the highest-resolution shell are shown in parentheses.

Table S3 Continued.

| Statistics                                           | GlcB C619A-17<br>complex         | GlcB C619A-18<br>complex         | GlcB C619A-19<br>complex         | GlcB C619A-23<br>complex         |
|------------------------------------------------------|----------------------------------|----------------------------------|----------------------------------|----------------------------------|
| PDB ID                                               | 5DX7                             | 5CW                              | 5DRC                             | 5DRI                             |
| Data Collection                                      |                                  |                                  |                                  |                                  |
| Wavelength (Å)                                       | 0.97946                          | 0.97947                          | 1.0332                           | 1.5                              |
| Space group                                          | P4 <sub>3</sub> 2 <sub>1</sub> 2 | P4 <sub>3</sub> 2 <sub>1</sub> 2 | P4 <sub>3</sub> 2 <sub>1</sub> 2 | P4 <sub>3</sub> 2 <sub>1</sub> 2 |
| Cell dimensions                                      |                                  |                                  |                                  |                                  |
| <i>a</i> , <i>b</i> , <i>c</i> (Å)                   | 78.95, 78.95,<br>225.13          | 78.38, 78.38,<br>225.19          | 78.96, 78.96,<br>224.97          | 79.30, 79.30,<br>224.98          |
| $\alpha$ , $\beta$ , $\gamma$ (°)                    | 90, 90, 90                       | 90, 90, 90                       | 90, 90, 90                       | 90, 90, 90                       |
| Unique reflections                                   | 38777                            | 40981                            | 33398                            | 17322                            |
| <i>R</i> <sub>sym</sub> or <i>R</i> <sub>merge</sub> | 0.129 (0.627)                    | 0.209 (0.606)                    | 0.108 (0.439)                    | 0.226 (0.836)                    |
| <i>I</i> / $\sigma$ <i>I</i>                         | 19.64 (3.42)                     | 17.58 (4.93)                     | 21.43 (6.64)                     | 20.02 (4.36)                     |
| Completeness (%)                                     | 90.83 (96.12)                    | 88.45 (98.43)                    | 87.82 (92.20)                    | 93.53 (98.44)                    |
| Redundancy                                           | 8.4 (8.5)                        | 4.8 (5.7)                        | 6.6 (7.5)                        | 12.9 (14.0)                      |
| Refinement                                           |                                  |                                  |                                  |                                  |
| Resolution (Å)                                       | 34.94-2.10<br>(2.15-2.10)        | 44.59-2.03 (2.08-<br>2.03)       | 44.78-2.18 (2.25-<br>2.18)       | 44.91-2.80<br>(2.98-2.80)        |
| <i>R</i> <sub>work</sub> / <i>R</i> <sub>free</sub>  | 0.184/0.256                      | 0.205/0.292                      | 0.172/0.250                      | 0.171/0.296                      |
| No. of atoms                                         |                                  |                                  |                                  |                                  |
| Protein                                              | 5460                             | 5448                             | 5473                             | 5419                             |
| Ligand/ion                                           | 15                               | 15                               | 38                               | 18                               |
| Water                                                | 482                              | 625                              | 511                              | 425                              |
| B factors                                            |                                  |                                  |                                  |                                  |
| Protein                                              | 33.4                             | 29.5                             | 23.4                             | 30.0                             |
| Mg                                                   | 26.1                             | 26.7                             | 21.2                             | 19.0                             |
| Small molecule                                       | 49.8                             | 36.8                             | 23.9                             | 20.9                             |
| Solvent                                              | 37.9                             | 38.2                             | 29.0                             | 29.7                             |
| Rmsd                                                 |                                  |                                  |                                  |                                  |
| Bond length (Å)                                      | 0.008                            | 0.010                            | 0.007                            | 0.011                            |
| Bond angles (°)                                      | 1.15                             | 1.16                             | 1.12                             | 1.11                             |
| Ramachandran                                         |                                  |                                  |                                  |                                  |
| Favored (%)                                          | 96.6                             | 96.7                             | 96.3                             | 93.8                             |
| Allowed                                              | 3.0                              | 2.4                              | 2.7                              | 4.3                              |
| Outliers (%)                                         | 0.4                              | 0.9                              | 1.0                              | 1.9                              |
| Clashscore                                           | 2.94                             | 5.43                             | 3.93                             | 6.57                             |

Statistics for the highest-resolution shell are shown in parentheses.

Table S3. Continued.

| Statistics                                           | GlcB C619A-25<br>complex         | GlcB WT<br>apo                   | GlcB WT-malate<br>complex        | GlcB G459A C619A-<br>malate complex |
|------------------------------------------------------|----------------------------------|----------------------------------|----------------------------------|-------------------------------------|
| PDB ID                                               | 5ECV                             | 5H8P                             | 5H8U                             | 5H8M                                |
| Data Collection                                      |                                  |                                  |                                  |                                     |
| Wavelength (Å)                                       | 0.987                            | 0.9795                           | 0.97880                          | 0.97934                             |
| Space group                                          | P4 <sub>3</sub> 2 <sub>1</sub> 2 | P4 <sub>3</sub> 2 <sub>1</sub> 2 | P4 <sub>1</sub> 2 <sub>1</sub> 2 | P4 <sub>3</sub> 2 <sub>1</sub> 2    |
| Cell dimensions                                      |                                  |                                  |                                  |                                     |
| <i>a</i> , <i>b</i> , <i>c</i> (Å)                   | 77.79, 77.79,<br>222.98          | 81.79, 81.79,<br>227.08          | 120.66, 120.66,<br>232.22        | 80.26, 80.26,<br>226.44             |
| $\alpha$ , $\beta$ , $\gamma$ (°)                    | 90, 90, 90                       | 90, 90, 90                       | 90, 90, 90                       | 90, 90, 90                          |
| Unique reflections                                   | 40884                            | 40314                            | 66430                            | 34332                               |
| <i>R</i> <sub>sym</sub> or <i>R</i> <sub>merge</sub> | 0.128 (0.681)                    | 0.119 (0.972)                    | 0.108 (0.94)                     | 0.418 (0.935)                       |
| <i>I</i> / $\sigma$ <i>I</i>                         | 11.6 (1.67)                      | 11.66 (3.44)                     | 14.96 (0.89)                     | 16.75 (1.13)                        |
| Completeness (%)                                     | 97.57 (98.43)                    | 88.21 (83.42)                    | 85.51 (11.96)                    | 89.53 (45.14)                       |
| Redundancy                                           | 6.5 (4.3)                        | 12.6 (13.1)                      | 14.4 (16.3)                      | 19.4 (17.9)                         |
| Refinement                                           |                                  |                                  |                                  |                                     |
| Resolution (Å)                                       | 44.21-2.08<br>(2.13-2.08)        | 45.96-2.10<br>(2.15-2.10)        | 37.36-2.85<br>(2.92-2.85)        | 45.36-2.70<br>(2.82-2.70)           |
| <i>R</i> <sub>work</sub> / <i>R</i> <sub>free</sub>  | 0.178/0.239                      | 0.251/0.312                      | 0.226/0.276                      | 0.226/0.322                         |
| No. of atoms                                         |                                  |                                  |                                  |                                     |
| Protein                                              | 5456                             | 5387                             | 10988                            | 5421                                |
| Ligand/ion                                           | 19                               |                                  | 17                               | 10                                  |
| Water                                                | 522                              | 102                              | 60                               | 58                                  |
| B factors                                            |                                  |                                  |                                  |                                     |
| Protein                                              | 28.9                             | 34.6                             | 78.9                             | 47.8                                |
| Mg                                                   | 17.5                             |                                  | 61.3                             | 30.1                                |
| Small molecule                                       | 21.8                             |                                  | 66.0                             | 43.3                                |
| Solvent                                              | 36.1                             | 27.7                             | 64.8                             | 37.6                                |
| Rmsd                                                 |                                  |                                  |                                  |                                     |
| Bond length (Å)                                      | 0.009                            | 0.008                            | 0.003                            | 0.008                               |
| Bond angles (°)                                      | 1.12                             | 1.16                             | 0.62                             | 1.14                                |
| Ramachandran                                         |                                  |                                  |                                  |                                     |
| Favored (%)                                          | 96.8                             | 94.7                             | 94.7                             | 92.6                                |
| Allowed                                              | 2.6                              | 4.2                              | 4.2                              | 6.2                                 |
| Outliers (%)                                         | 0.7                              | 1.0                              | 1.0                              | 1.2                                 |
| Clashscore                                           | 4.60                             | 7.07                             | 5.94                             | 8.07                                |

Statistics for the highest-resolution shell are shown in parentheses.



Figure S1. Crystal structure of GlcB complexed with Group 1 fragments showing the electron density of omit  $F_o-F_c$  map for the bound fragment contoured as following: (A) **1** at 2.5  $\sigma$ , (B) **2** at 3.5  $\sigma$ , (C) **3** at 2.5  $\sigma$ , (D) **4** at 2.5  $\sigma$ , and (E) **5** at 4  $\sigma$ . Atom colors: chartreuse, magnesium; darkgrey/black, carbon; red, oxygen; blue, nitrogen; light green, fluorine; green, chlorine; brown, bromine; yellow, sulfur. Images are rendered in CHIMERA.

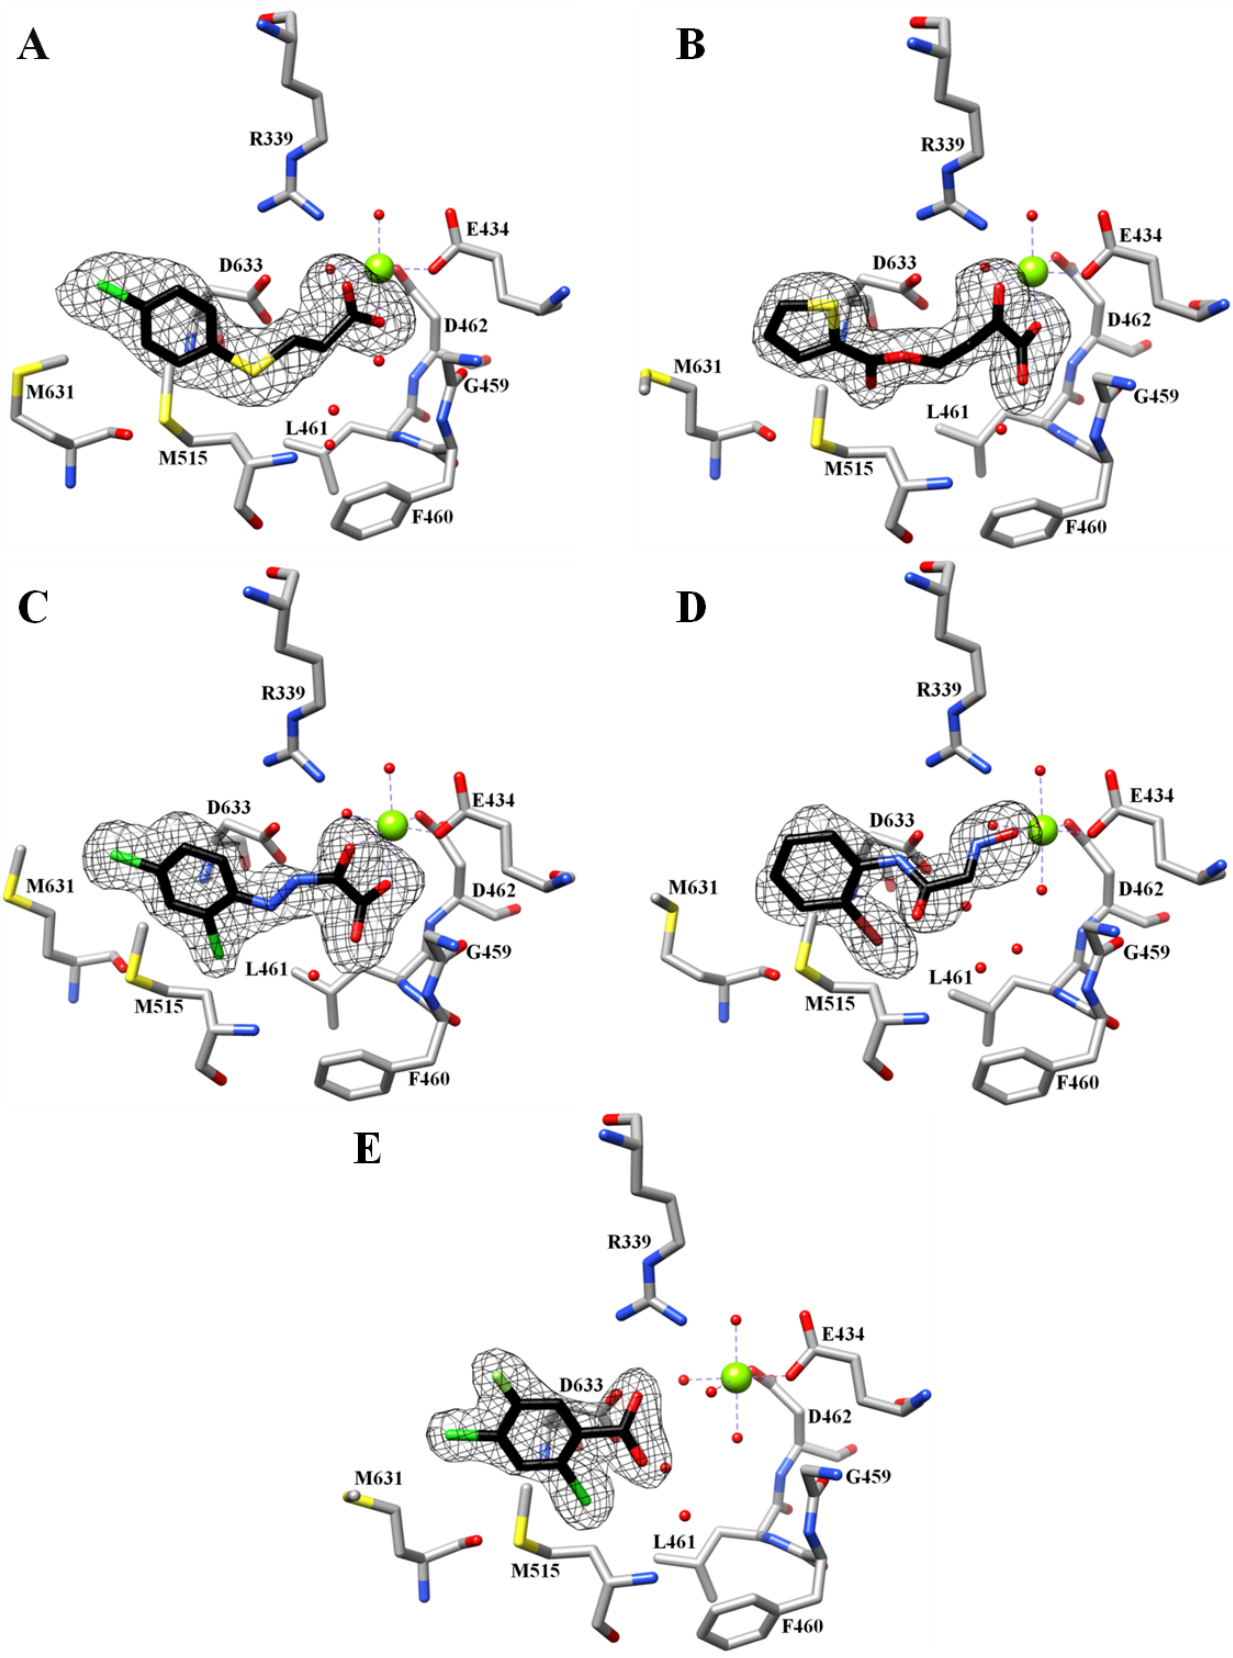

Figure S2. Crystal structure of GlcB complexed with Group 2 fragments showing the electron density of omit  $F_o-F_c$  map for the bound fragment contoured as following: (A) **6** at 3.65  $\sigma$ , (B) **7** at 4  $\sigma$ , (C) **8** at 3  $\sigma$ , (D) **9** at 2.8  $\sigma$ , (E) **10** at 3.3  $\sigma$ , (F) **11** at 2.5  $\sigma$ , (G) **12** at 2.55  $\sigma$ , (H) **13** at 2.55  $\sigma$ , (I) **14** at 2.5  $\sigma$ , (J) **15** at 2.7  $\sigma$ , (K) **16** at 3  $\sigma$ , (L) **17** at 2.5  $\sigma$ , and (M) **18** at 2.5  $\sigma$ . Atom colors: chartreuse, magnesium; sandy brown/sienna, carbon; red, oxygen; blue, nitrogen; light green, fluorine; green, chlorine; brown, bromine; yellow, sulfur. Images are rendered in CHIMERA.

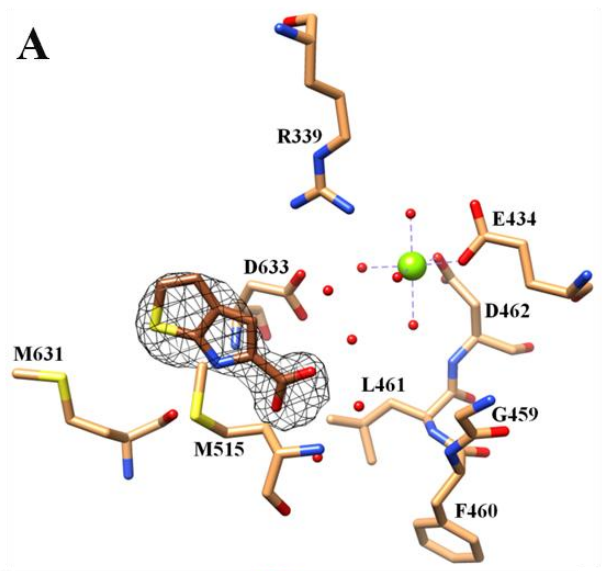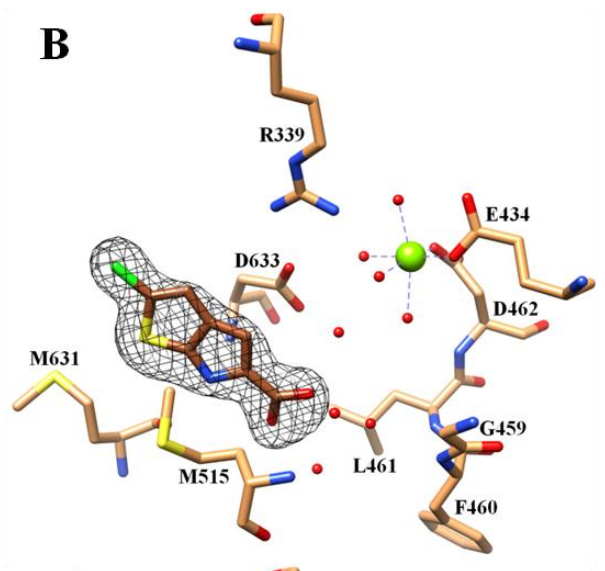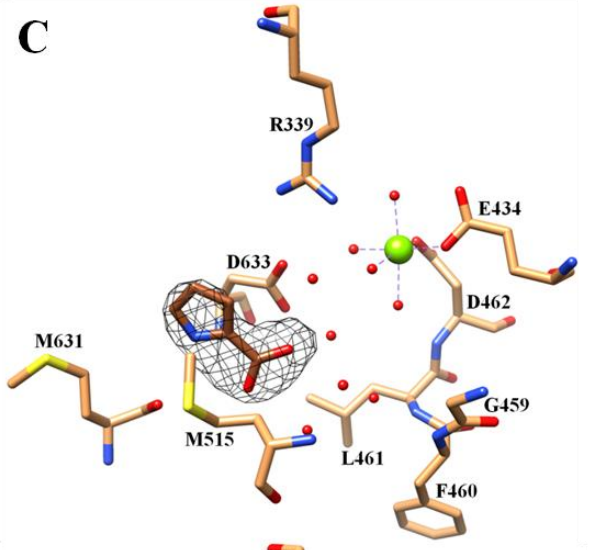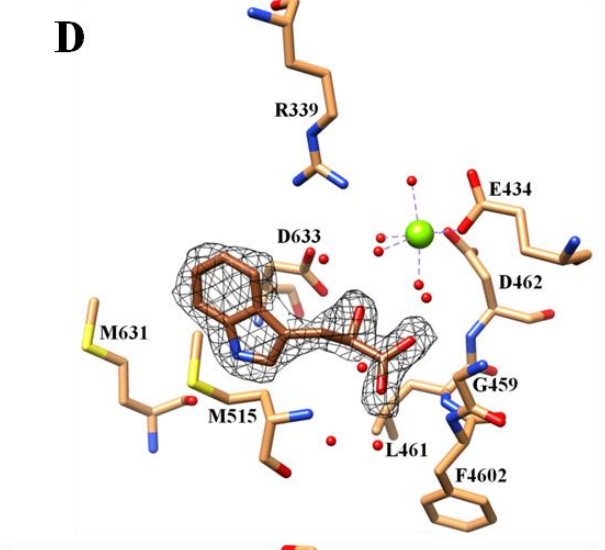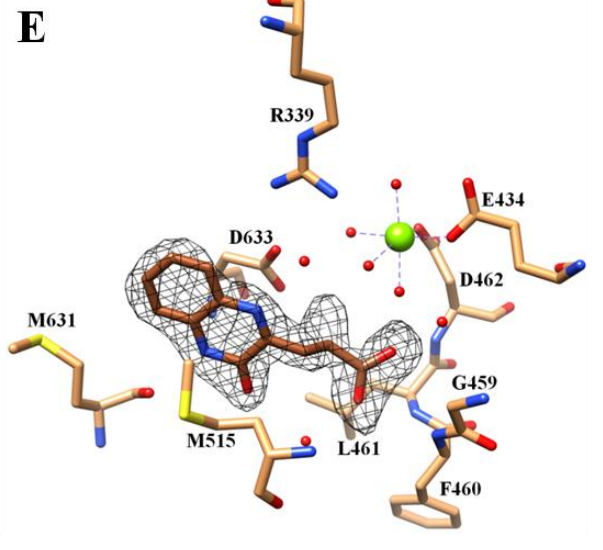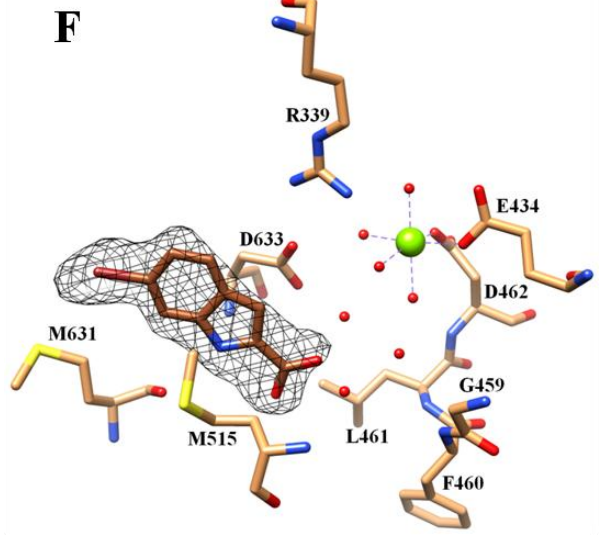

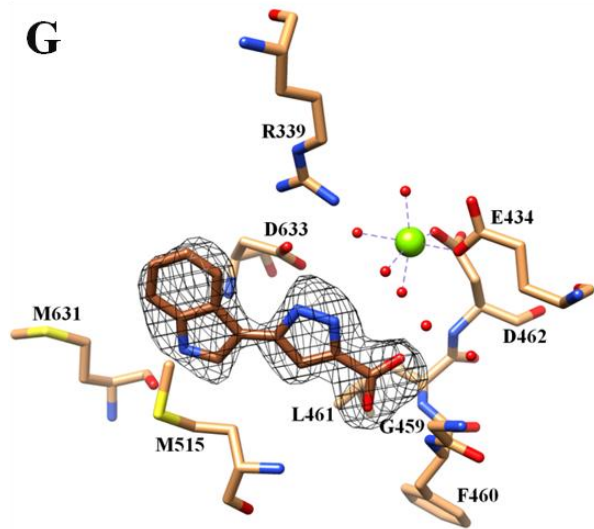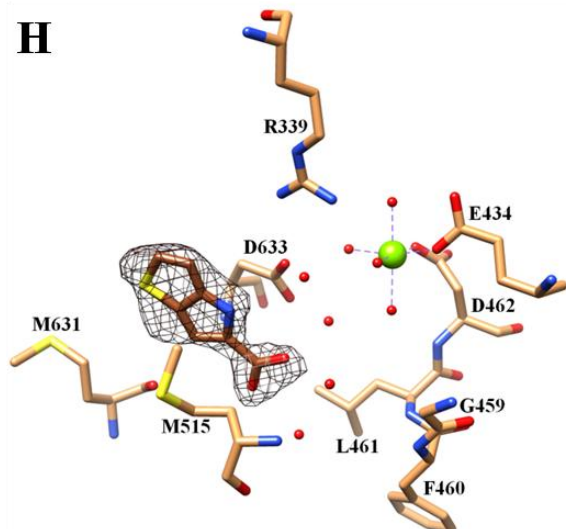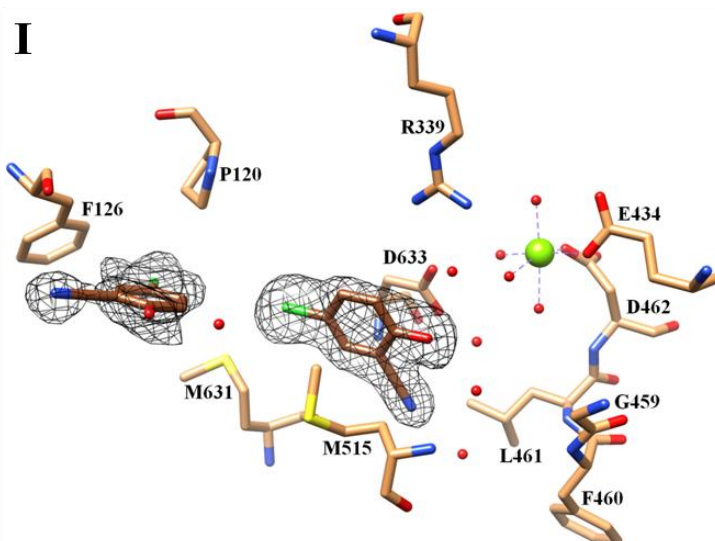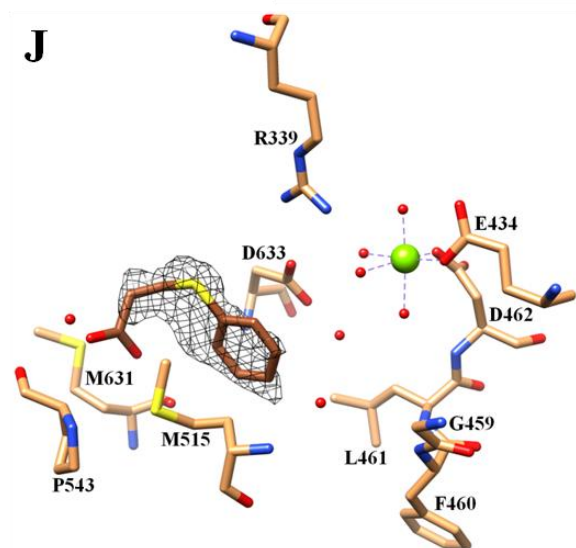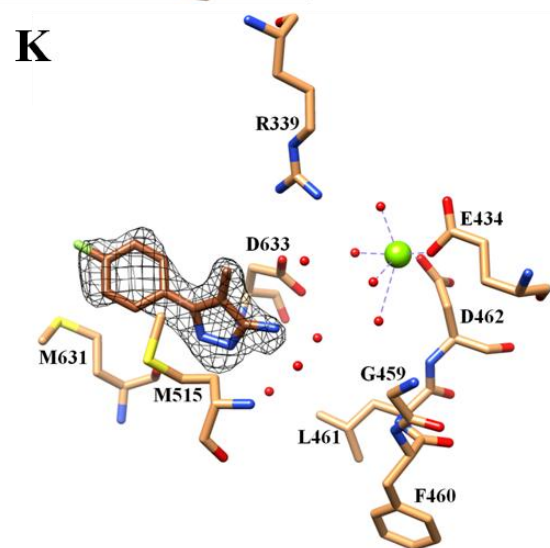

**L**

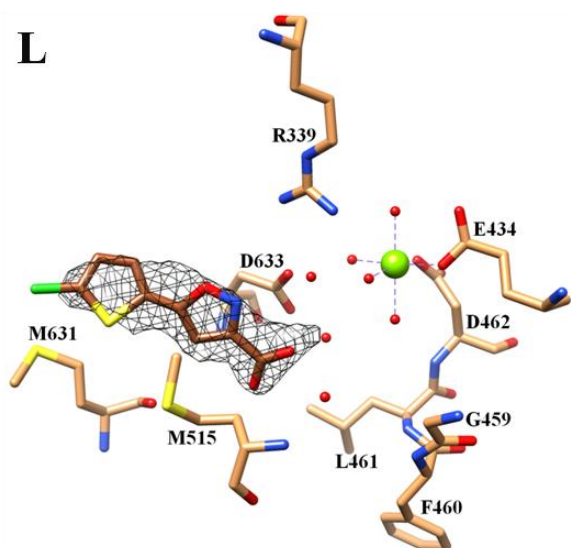

**M**

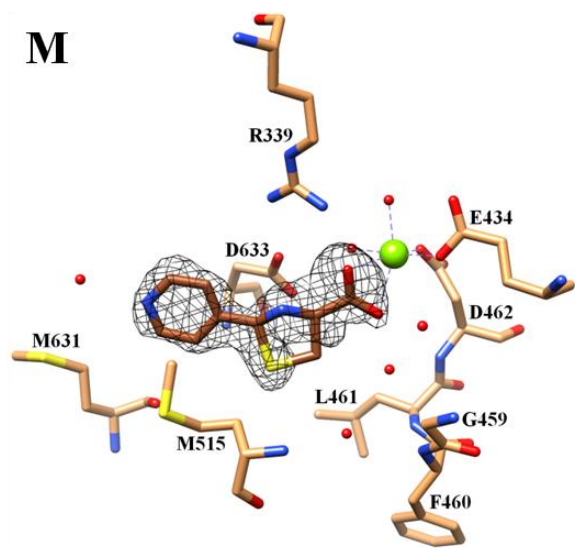

Figure S3. Crystal structure of GlcB complexed with Group 1 fragments showing the hydrogen bond and metal chelating interactions among the fragment, water molecules, and the active site residues: **(A) 1**, **(B) 2**, **(C) 3**, **(D) 4**, and **(E) 5**. Atom colors: chartreuse, magnesium; dark grey/black, carbon; red, oxygen; blue, nitrogen; light green, fluorine; green, chlorine; brown, bromine; yellow, sulfur. Images are rendered in CHIMERA.

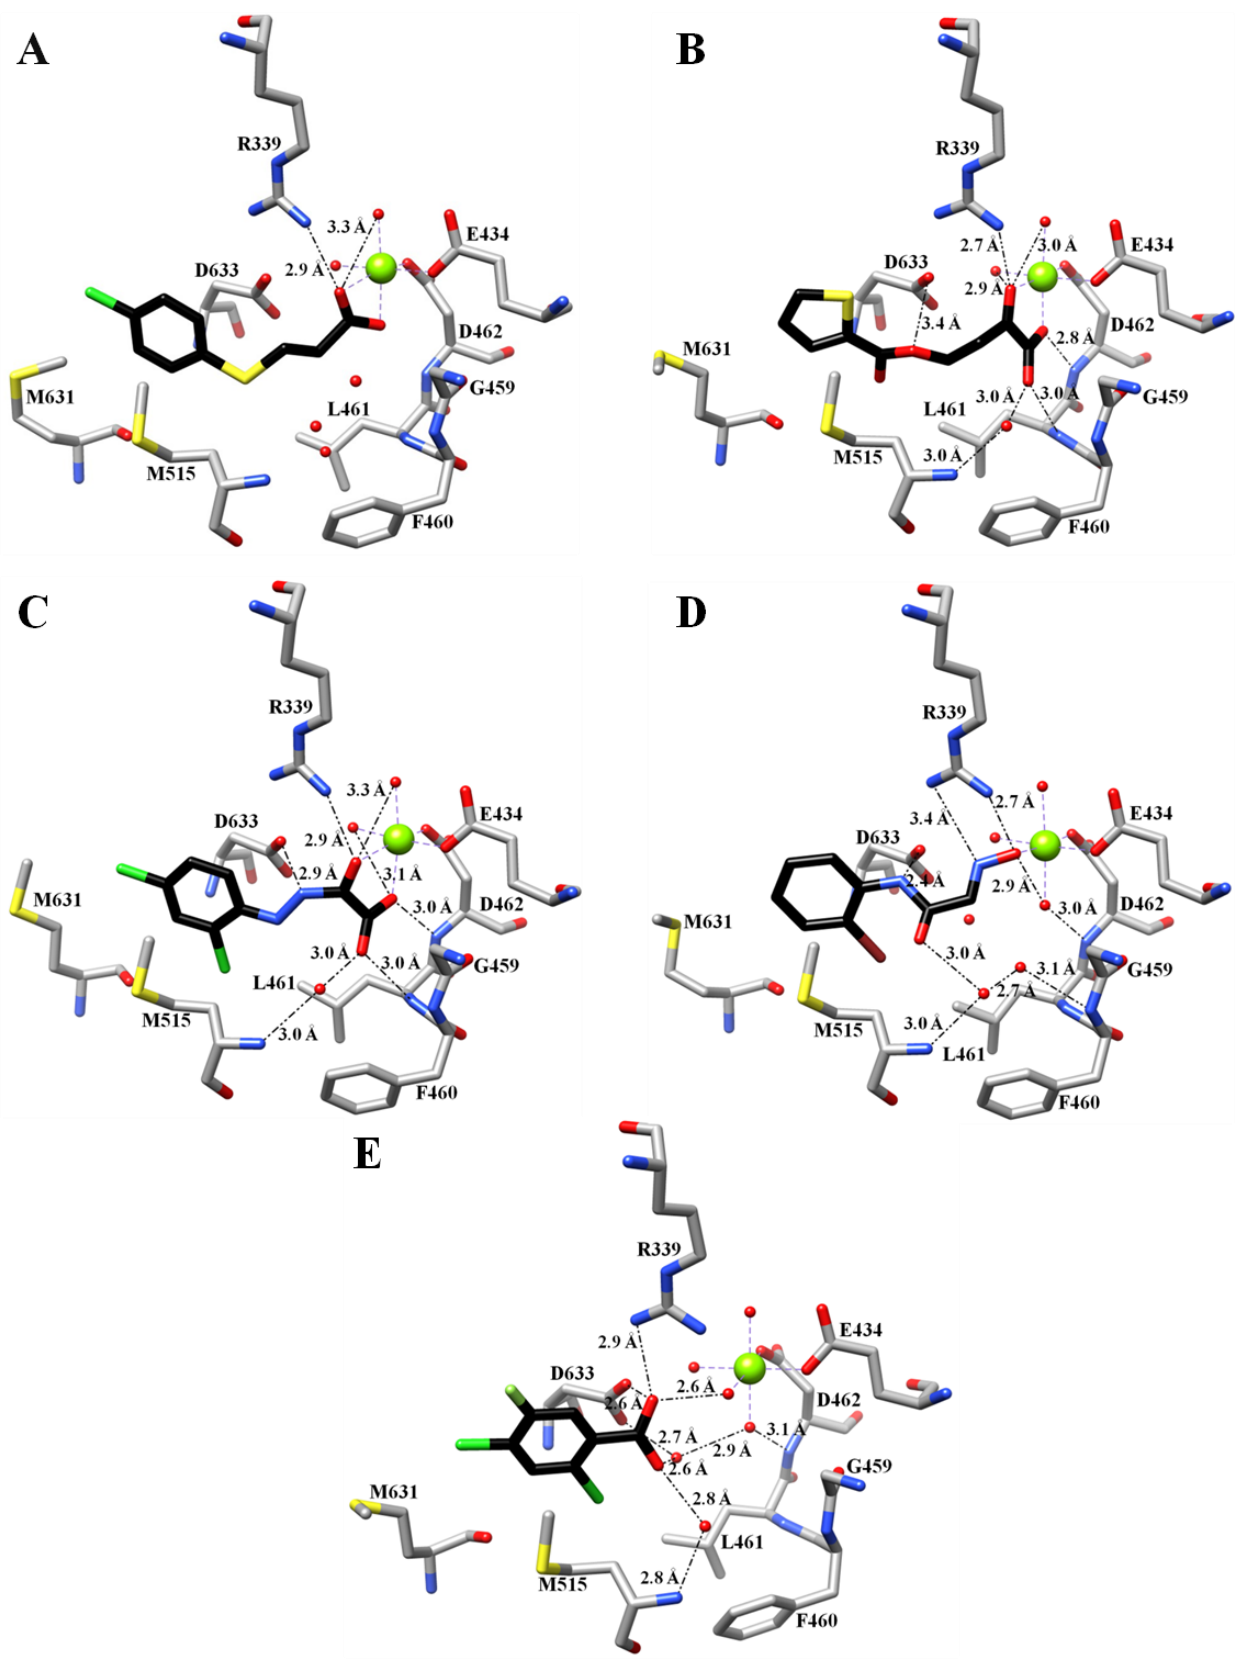



Figure S4. Crystal structure of GlcB complexed with Group 2 fragments showing the H-bond and metal chelating interactions among the fragment, water molecules, and the active site residues: (A) **6**, (B) **7**, (C) **8**, (D) **9**, (E) **10**, (F) **11**, (G) **12**, (H) **13**, (I) **14**, (J) **15**, (K) **16**, (L) **17**, and (M) **18**. Atom colors: chartreuse, magnesium; sandy brown/sienna, carbon; red, oxygen; blue, nitrogen; light green, fluorine; green, chlorine; brown, bromine; yellow, sulfur. Images are rendered in CHIMERA.

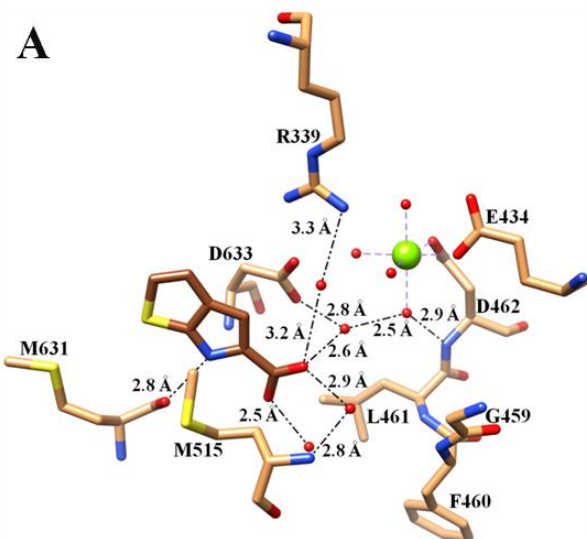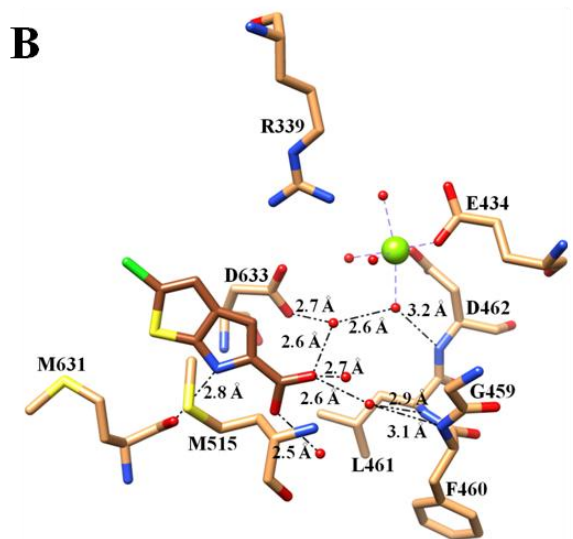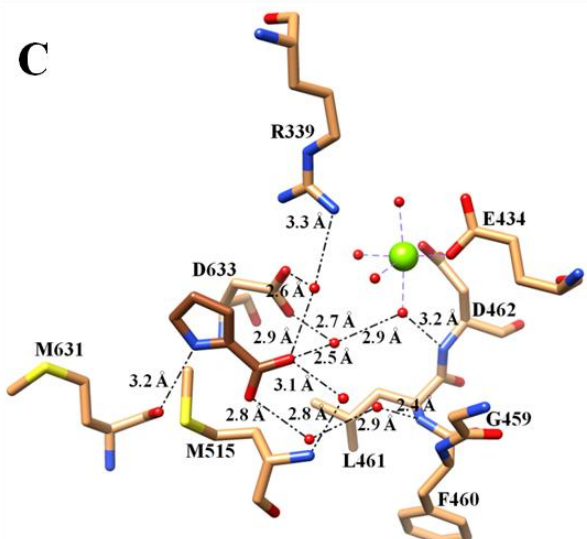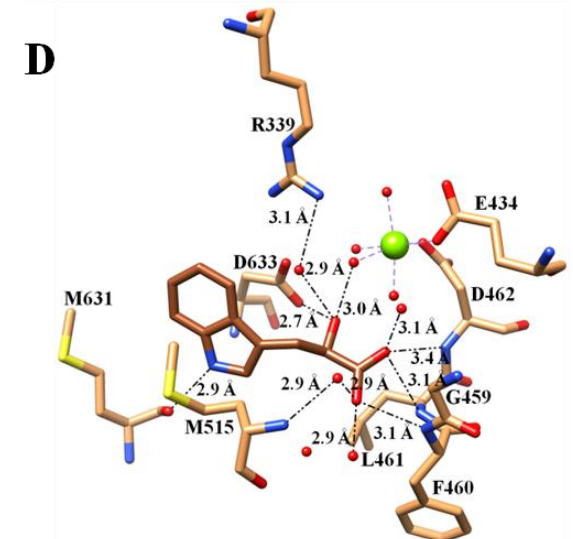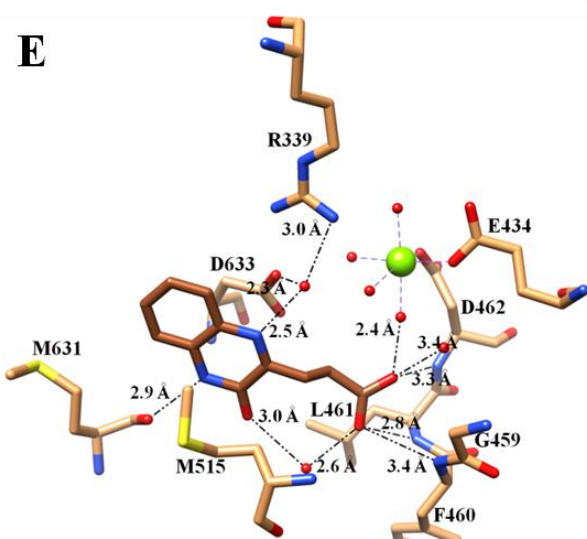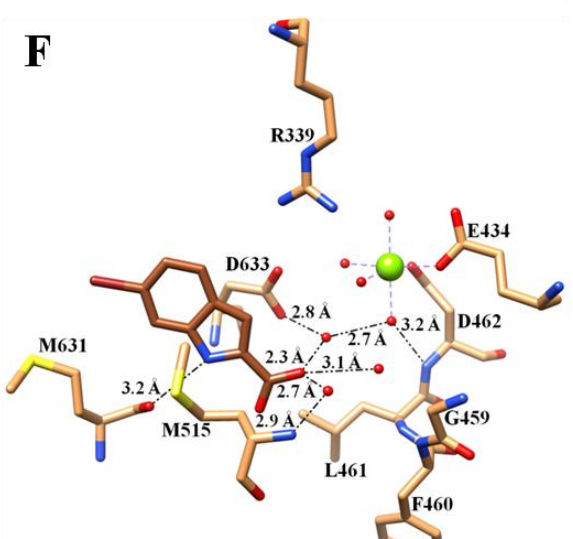

**G**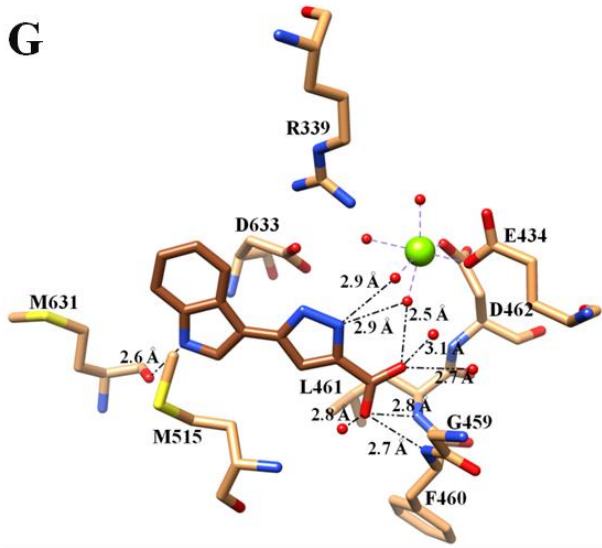**H**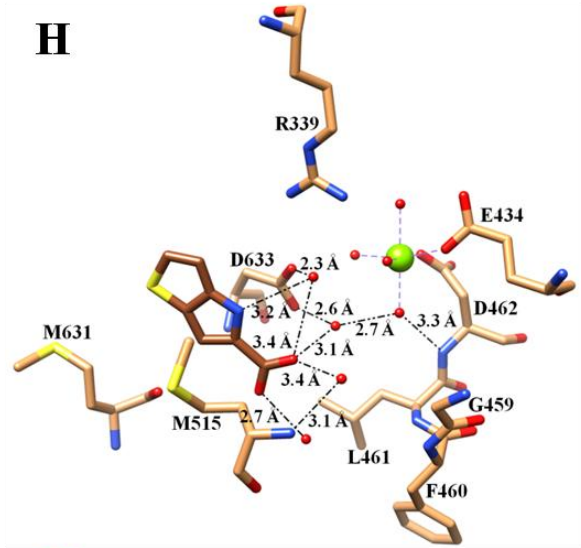**I**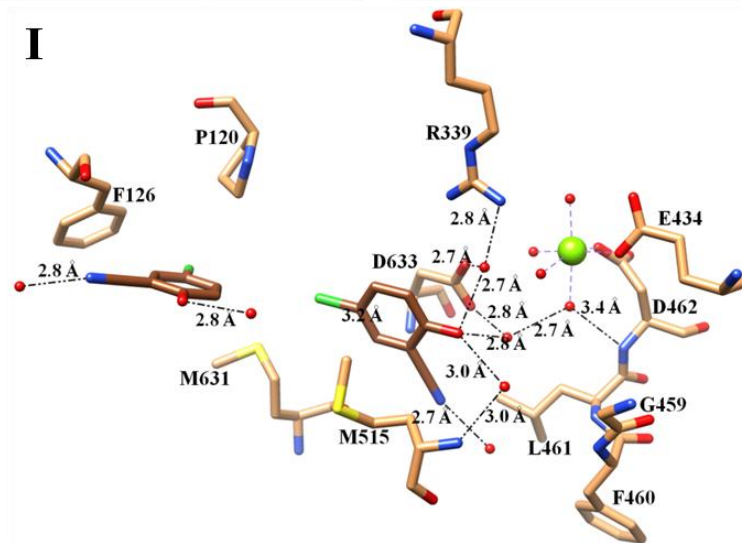**J**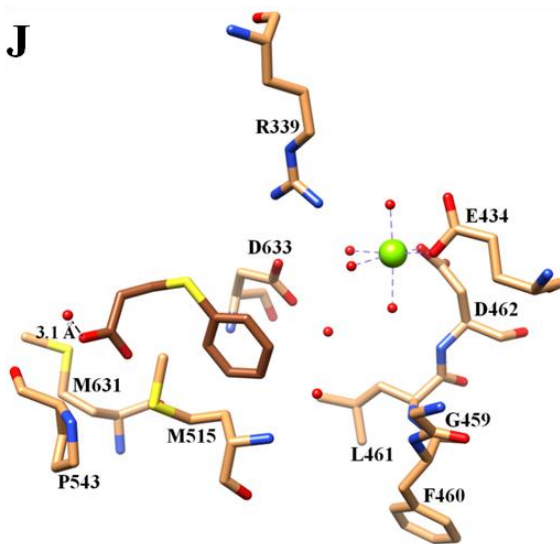**K**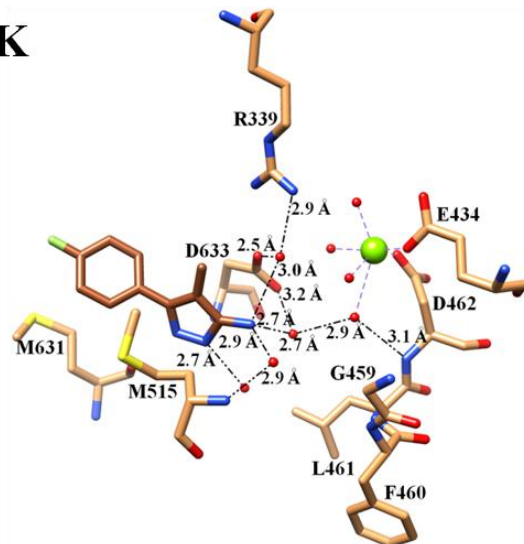

**L**

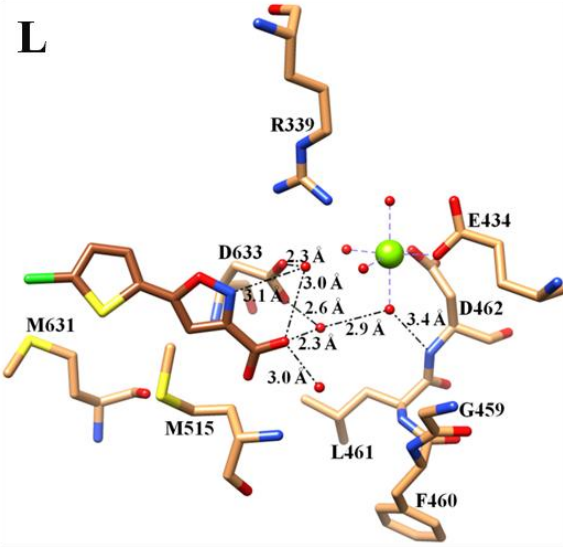

**M**

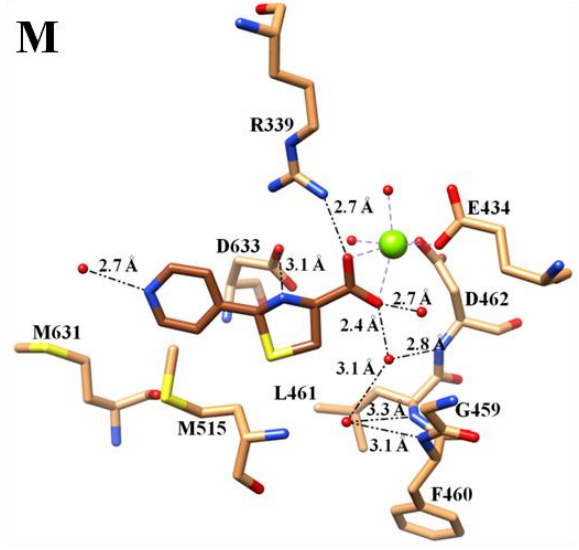

Figure S5. Crystal structure of GlcB complexed with indole diketo acids showing the H-bond and metal chelating interactions among the indole diketo acid molecule, water molecules, and the active site residues: (A) **19**, (B) **23**, and (C) **25**. Atom colors: chartreuse, magnesium; light blue/sky blue, carbon; red, oxygen; blue, nitrogen; yellow, sulfur. Images are rendered in CHIMERA.

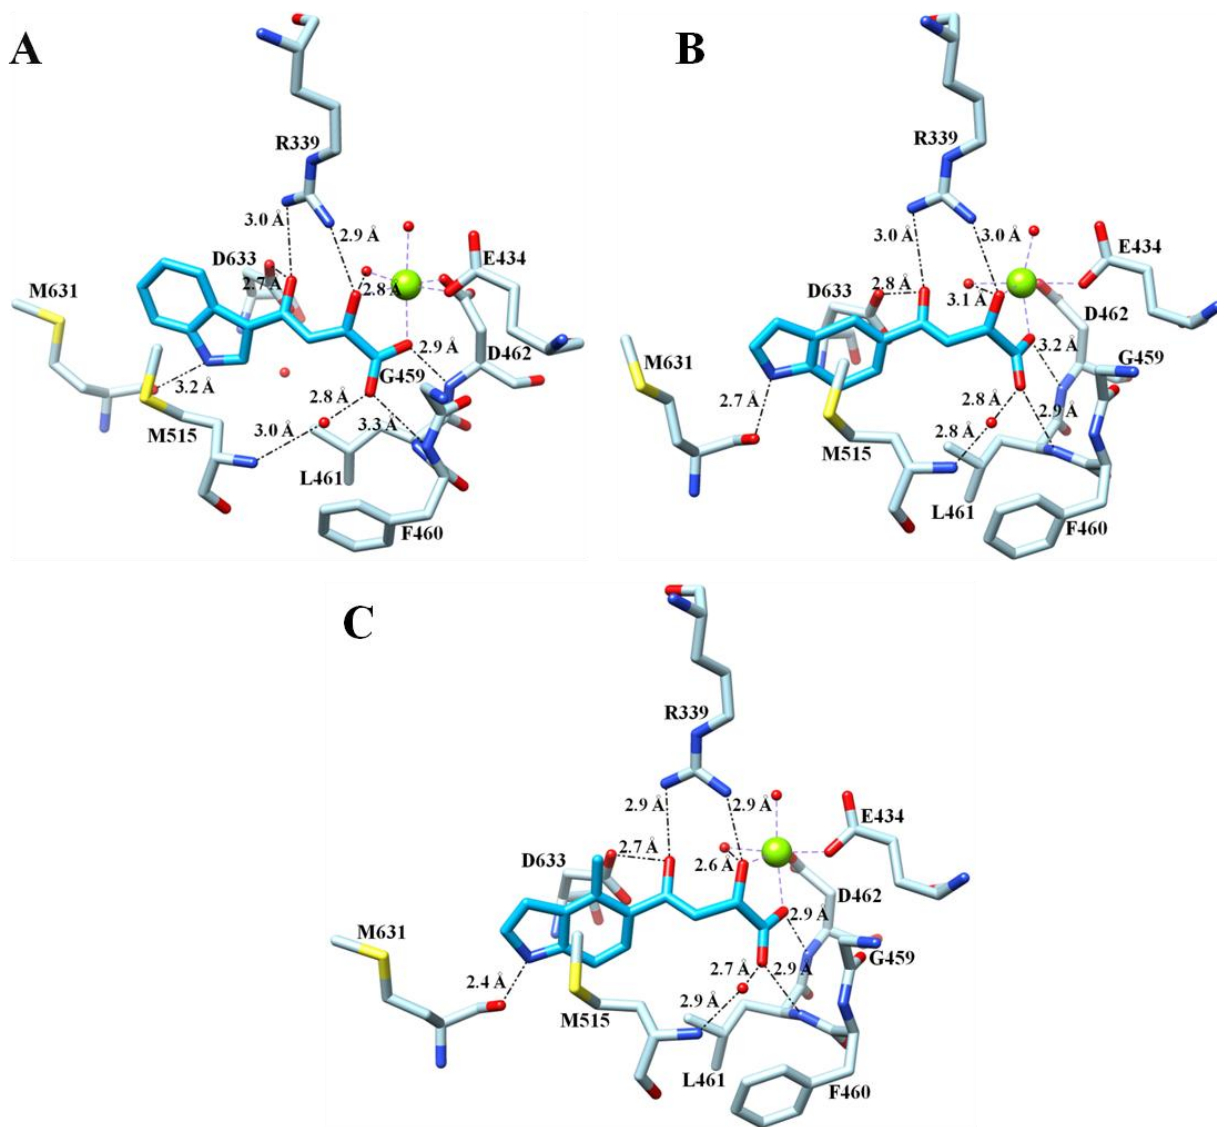

Supplement: 10.1074_M116.750877_jbc.M116.750877-1.pdf [file 10.1074_M116.750877_jbc.M116.750877-1.pdf]
